# Supplementary material for: Cell surface protein aggregation triggers endocytosis to maintain plasma membrane proteostasis
Source: PubMed Central journal article supplement (PMC9974993; doi:10.1038/s41467-023-36496-y), 2023-02-28
Supplement: 41467_2023_36496_MOESM3_ESM.pdf [file 41467_2023_36496_MOESM3_ESM.pdf]

## Description of Additional Supplementary Files

### File name: Supplementary Movie 1

**Description: BS4 marks large endocytic vesicles.** Dynamics of BS4-dylight650 endocytosis in SkBr3 cells at indicated times after antibody addition. Time [min:sec]. Scale bar: 5  $\mu\text{m}$ .

### File name: Supplementary Movie 2

**Description: BS4 binding does not alter plasma membrane movements.** Cells expressing GPI-membrane bound GFP were imaged before and immediately after addition of BS4-dylight650. Time [min:sec].

### File name: Supplementary Movie 3

**Description: Concentration of surface bound BS4 by inwards moving lamellipodium.** Cells expressing GPI-membrane bound GFP were imaged immediately after addition of BS4-dylight650. Time [min:sec]. Scale bar: 5  $\mu\text{m}$ .

### File name: Supplementary Movie 4

**Description: 3D view of BS4 concentration by inwards moving lamellipodium wave.** Cells expressing GPI-membrane bound GFP were imaged immediately after addition of BS4-dylight650.

### File name: Supplementary Movie 5

**Description: Rac1 inhibition prevents plasma membrane movement.** Cells expressing GPI-membrane bound GFP were imaged before and after addition of Rac1 inhibitor EHT1864. Time [min:sec].

### File name: Supplementary Movie 6

**Description: Morphodynamics of BS4 uptake.** Cells expressing GPI-membrane bound GFP were imaged immediately after addition of BS4-dylight650. Time [min:sec].

### File name: Supplementary Movie 7

**Description: BS4 uptake morphologically resembles macropinocytosis.** Cells expressing GPI-membrane bound GFP were imaged immediately after addition of BS4-dylight650. 3D views, surface rendering of the plasma membrane (green) and frame number (1 frame/10s) are displayed.

### File name: Supplementary Movie 8

**Description: Uptake dynamics of wheat-germ-agglutinin (WGA) resemble BS4 endocytosis.** Dylight650 labelled WGA or biparatopic antibody BS4 was added onto SkBr3 cells, and imaging started immediately after. Time [min:sec].
